# Supplementary material
Source: PubMed Central journal article supplement (PMC2845738)
Supplement: NIHMS172351-supplement-Figs_1-9.pdf [file NIHMS172351-supplement-Figs_1-9.pdf]

## Garrity\_supplementary fig. 1

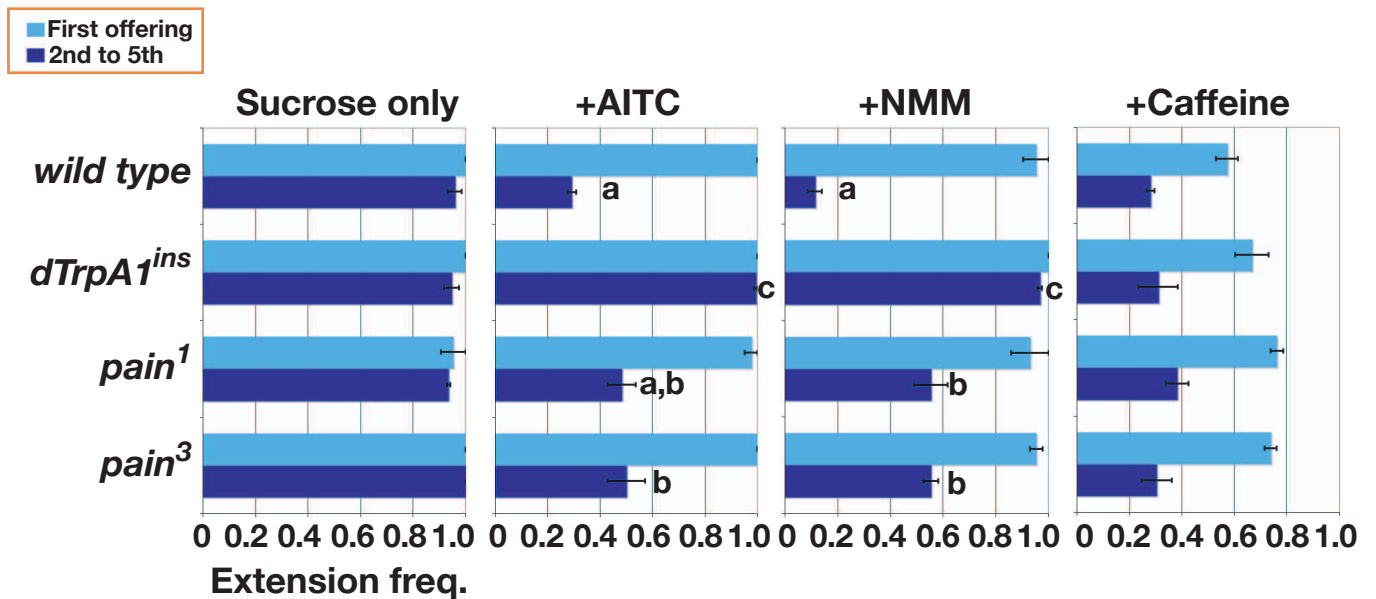

**Supplementary Figure 1: *painless* mutant responses to reactive electrophiles.** PER responses, ingestion permitted. Light blue, PER for first offering; dark blue, PER for second to fifth offerings combined. AITC and NMM significantly inhibited PER responses in *painless* mutant flies, although the inhibitory effect was less than in wild type. Statistically distinct groups marked by different letters (Tukey HSD,  $\alpha=0.05$  for +AITC,  $\alpha=0.01$  for + NMM). n=3 groups of 7-8 flies.

# Garrity\_supplementary fig. 2

**a**

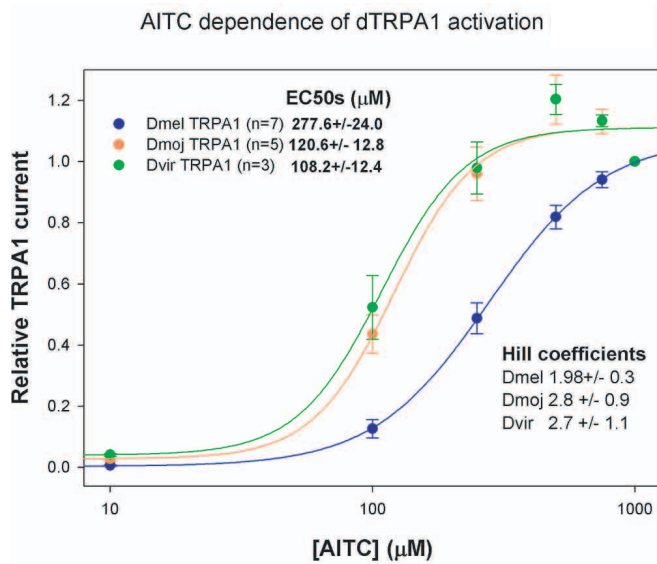

**b**

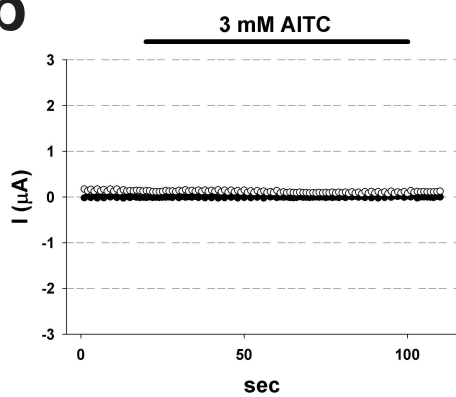

**c**

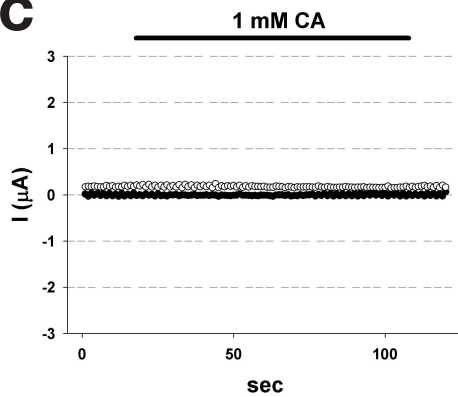

**d**

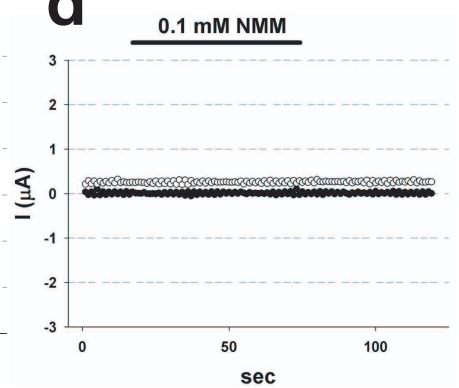

**Supplementary Figure 2: Dose-response and dTRPA1-dependence of chemically activated currents in oocytes. a**, AITC dose-response curves for dTRPA1 orthologs from *D. melanogaster*, *D. mojavensis* and *D. virilis*. **b, c, d**, Uninjected oocytes do not respond to reactive electrophiles. Examples of uninjected oocytes treated with 3 mM AITC (**b**), 1mM CA (**c**) and 0.1 mM NMM (**d**).

## Garrity\_supplementary fig. 3

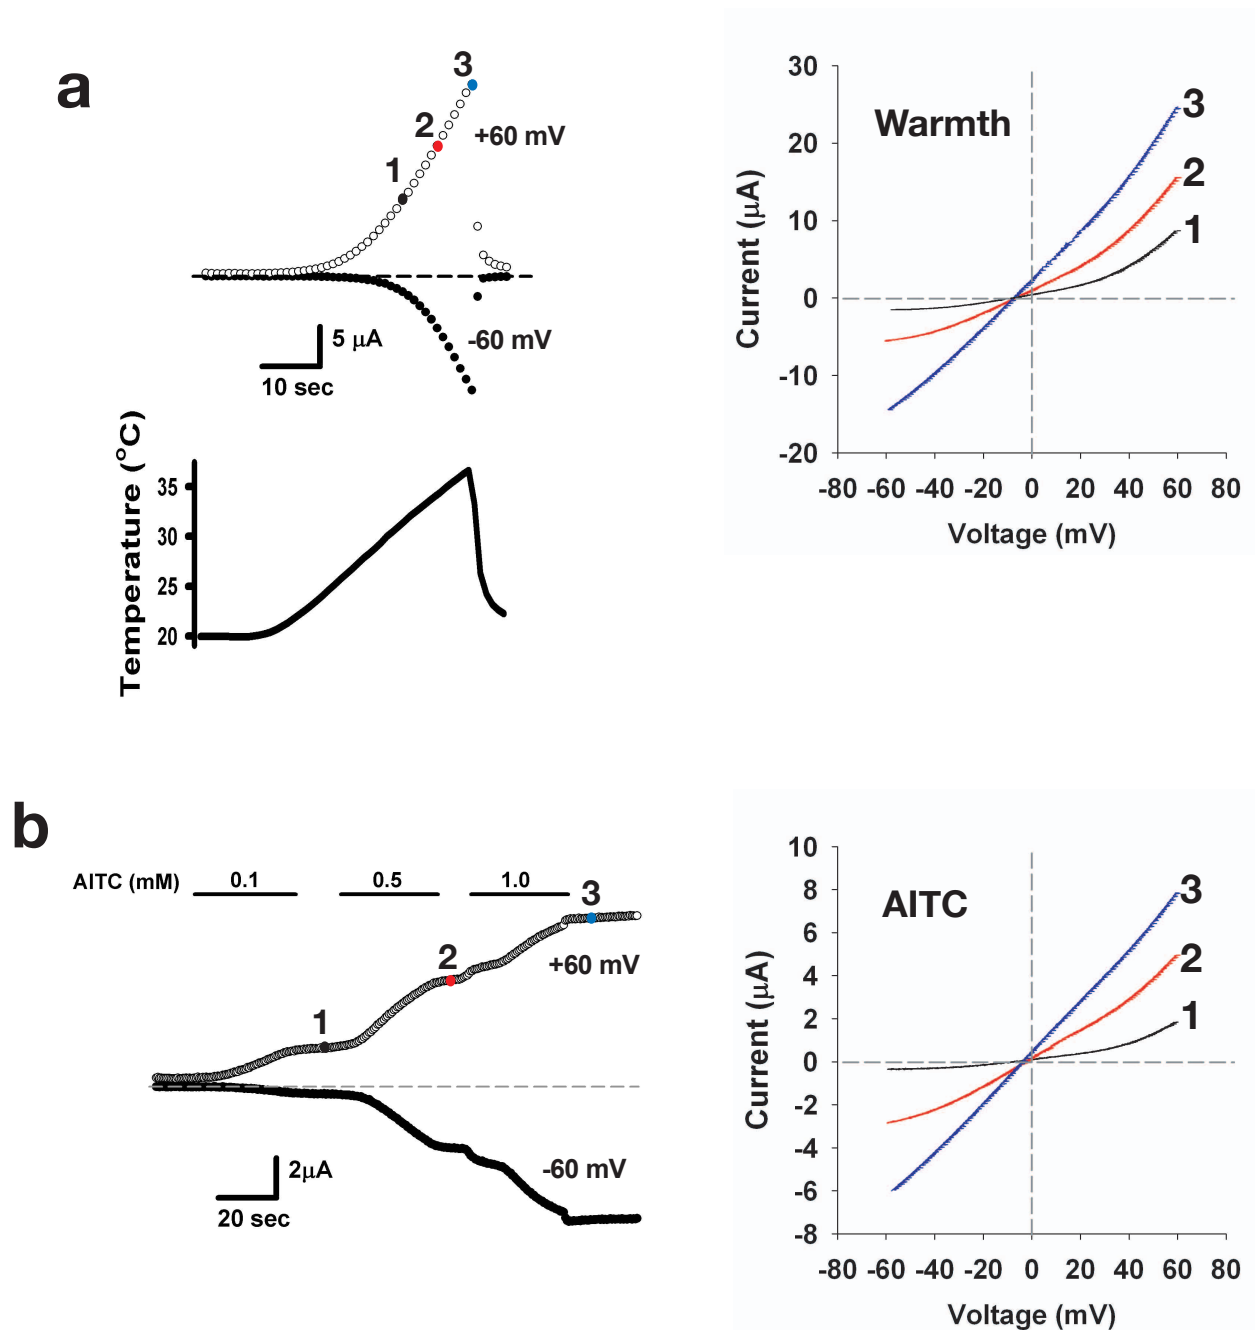

**Supplementary Figure 3: Thermal and chemical activation of dTRPA1 yield currents with similar I-V properties.** **a**, Warmth-activated dTRPA1 currents (left panel) and their I-V relationships (right panel). **b**, AITC-activated dTRPA1 currents (left panel) and their I-V relationships (right panel). In both cases, the degree of outward rectification of the channel decreases as dTRPA1 is increasingly activated. Also note that while heat-activated currents decline rapidly upon cooling (a), chemically activated currents are more sustained (b), consistent with covalent modification of the channel by AITC.

# Garrity\_supplementary fig. 4

a

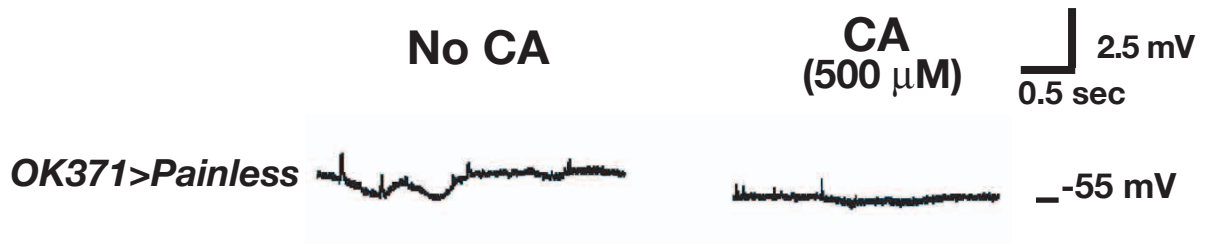

**Supplementary Figure 4: Ectopic Painless expression does not confer pungent chemical sensitivity upon motor neurons.** Intracellular recordings from third instar larval muscles of *OK371>Painless* animals before and during treatment with 500  $\mu$ M cinnamaldehyde (CA). CA application does not induce excitatory junctional potentials (EJPs).

## Garrity\_supplementary fig. 5

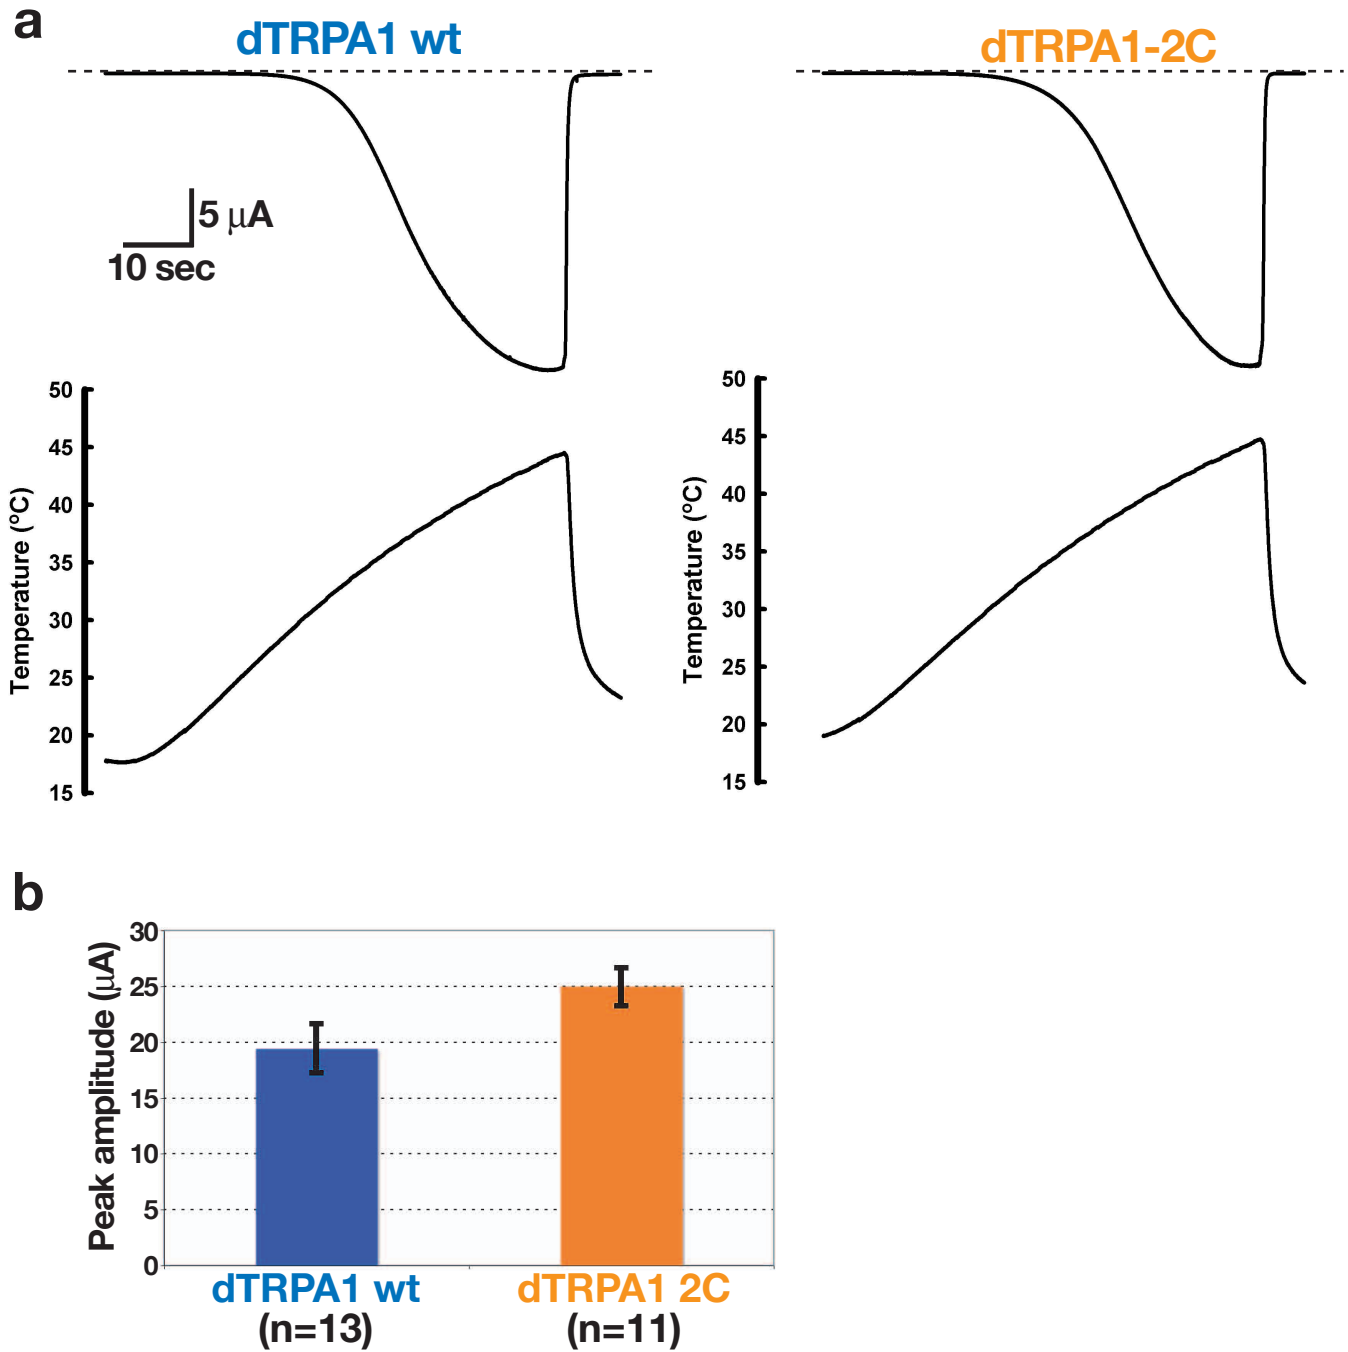

**Supplementary Figure 5: Warming robustly activates dTRPA1-2C.** **a**, Representative warmth-evoked currents in oocytes expressing wild type (dTRPA1 wt) and mutant (dTRPA1-2C) TRPA1 channels. **b**, Peak amplitude of warmth-evoked currents. Differences in peak amplitude did not reach statistical significance.

## Garrity\_supplementary fig. 6

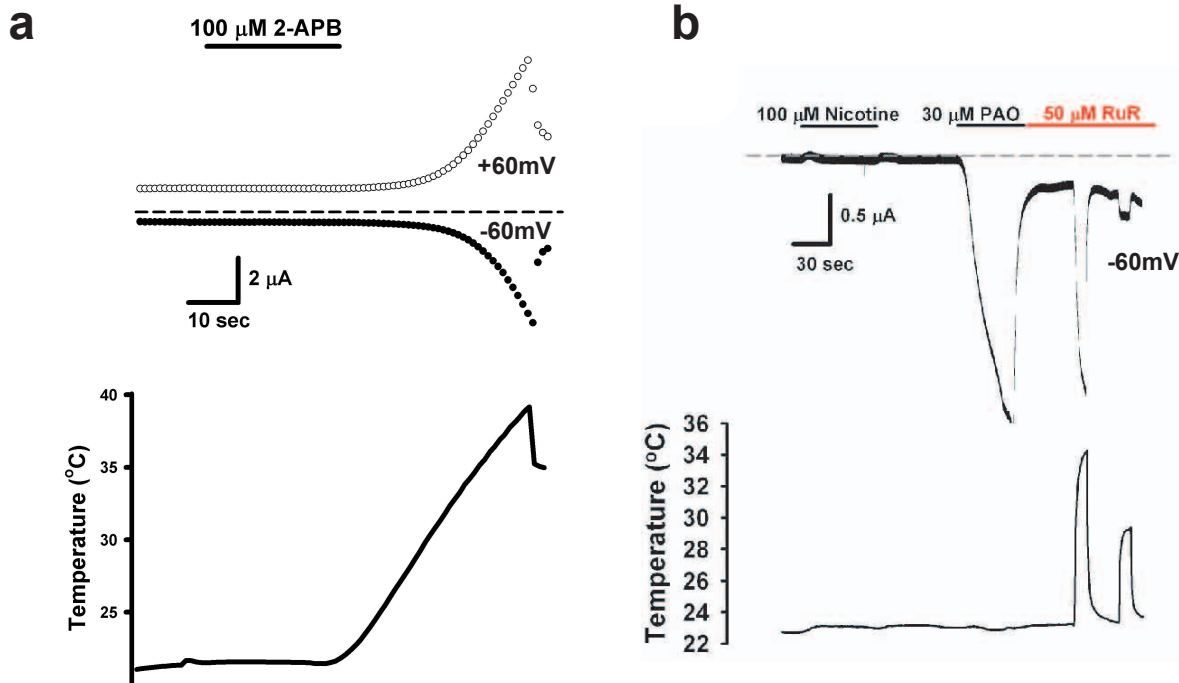

**Supplementary Figure 6: dTRPA1 did not detectably respond to 2-APB or nicotine.** dTRPA1 expressing oocytes exhibited did not respond to treatment with 100  $\mu$ M 2-APB (panel a) or nicotine (panel b). Subsequent activation of dTRPA1 by heat and/or the cysteine-modifying reagent phenylarsine oxide (PAO, 30  $\mu$ M) was used to confirm that the oocytes expressed functional dTRPA1 channels.

# Garrity\_supplementary fig. 7

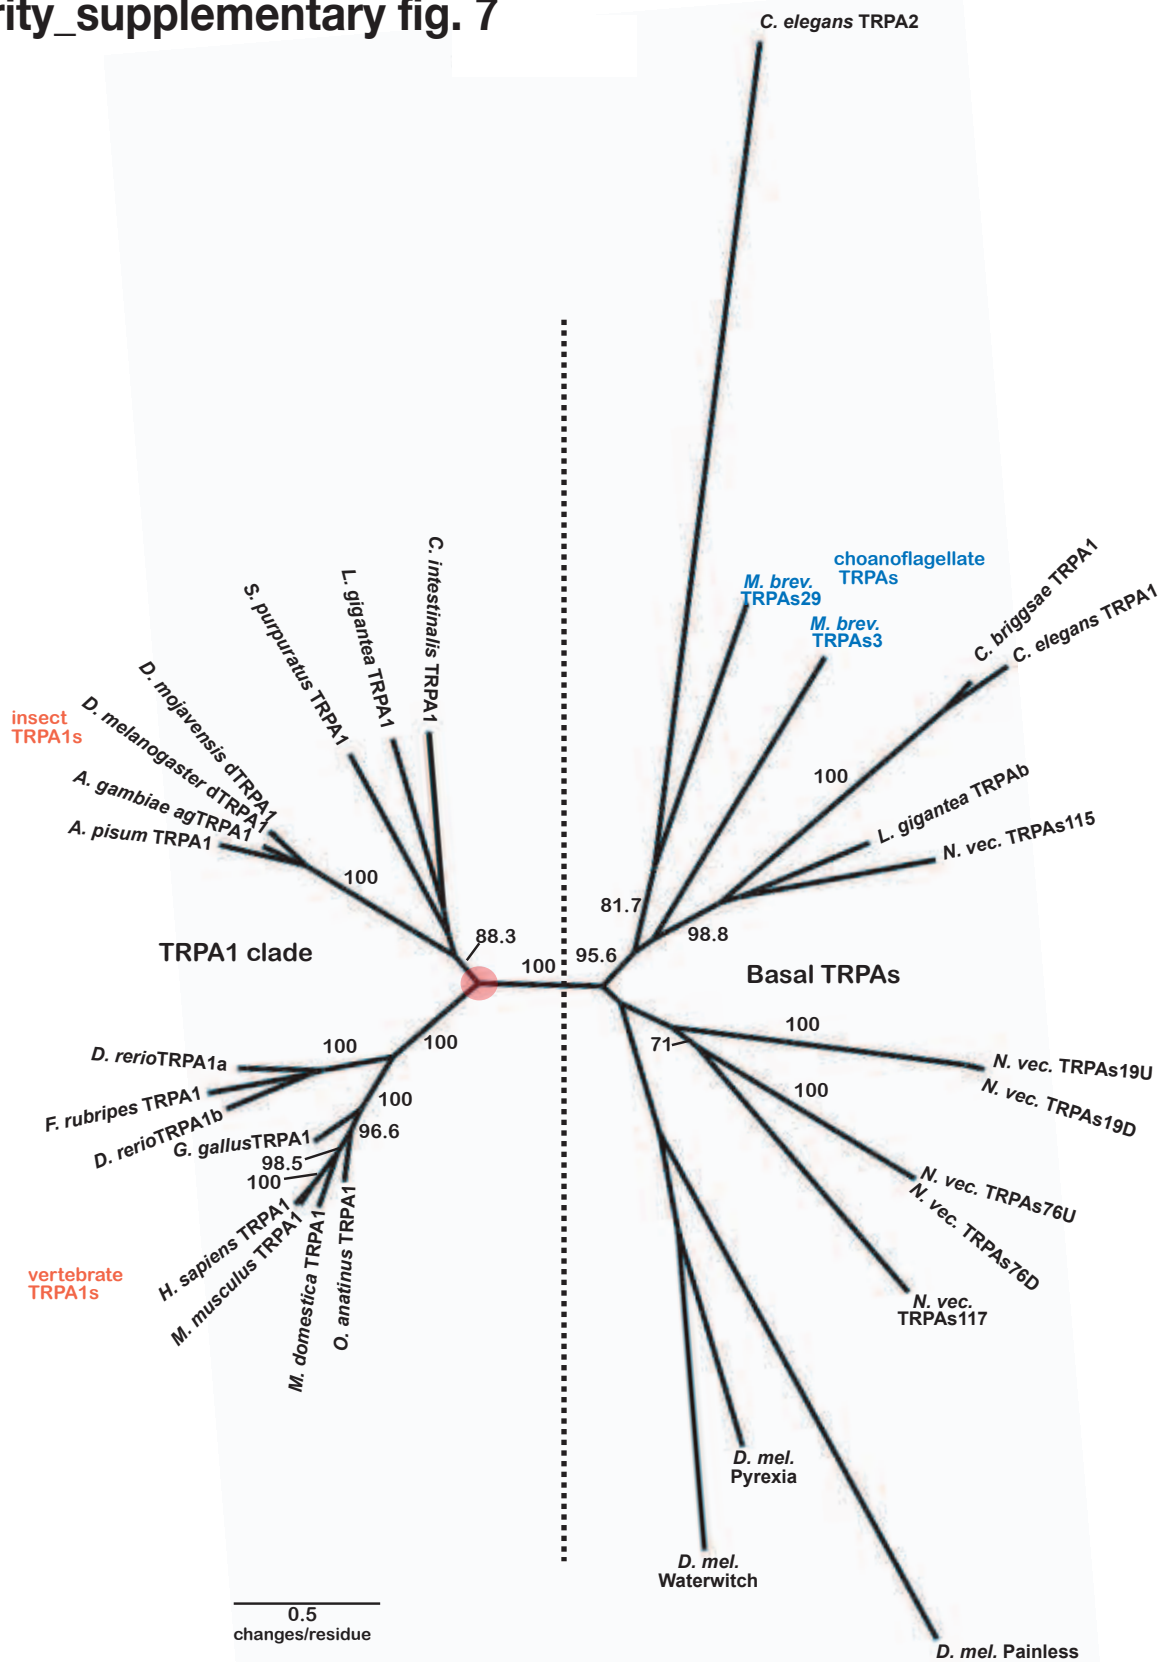

**Supplementary Figure 7: TRPA channel phylogeny by Maximum Likelihood.**

Internal branches are labeled with bootstrap percentages. Branches with bootstrap percentages below 70% unlabeled, branches below 50% collapsed.

# Garrity\_supplementary fig. 8

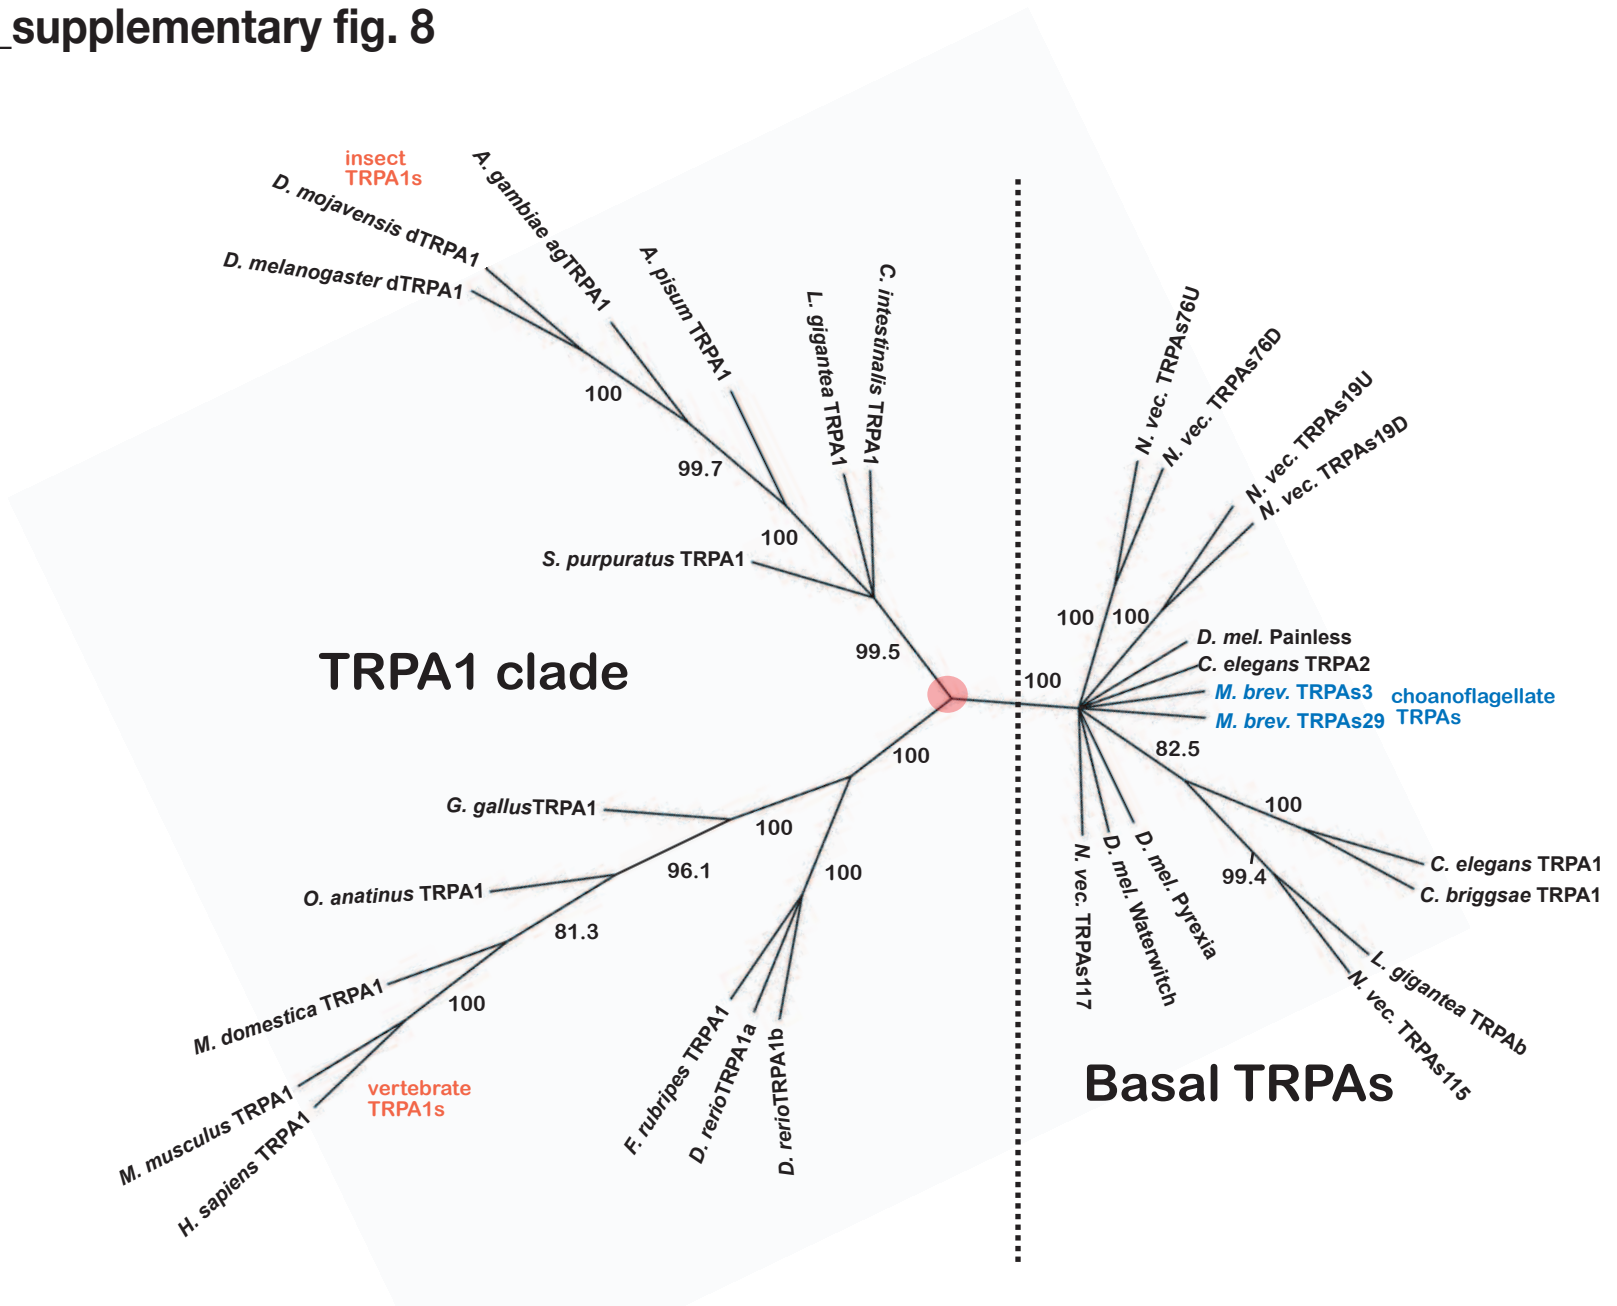

**Supplementary Figure 8: TRPA channel phylogeny by Neighbor Joining.** Internal branches are labeled with bootstrap percentages. Branches with bootstrap percentages below 75% collapsed.



# Garrity\_supplementary fig. 9 (part 1 of 3)

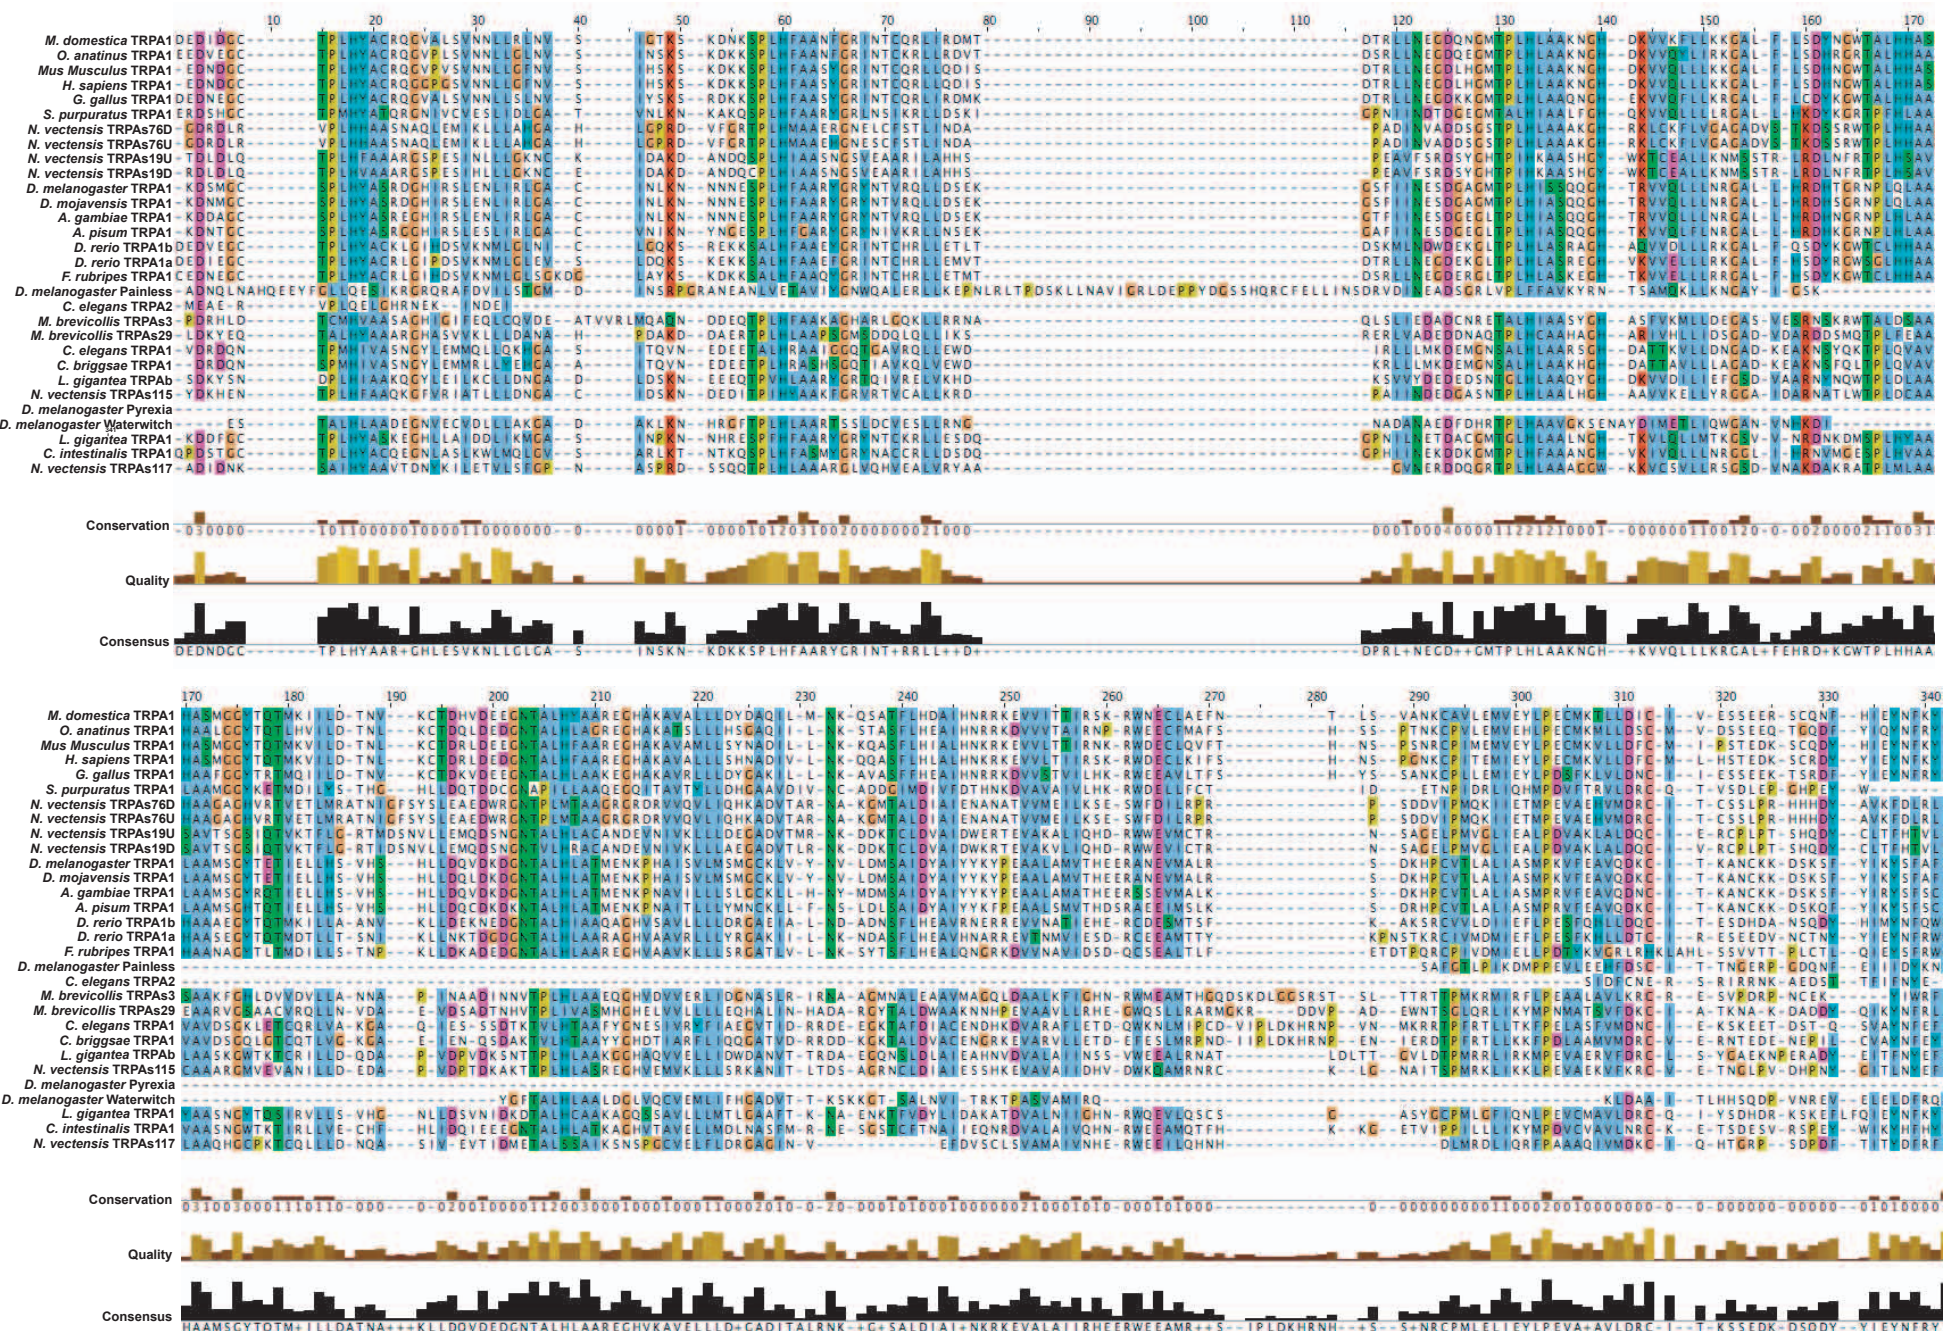

# Garrity\_supplementary fig. 9 (part 2 of 3)

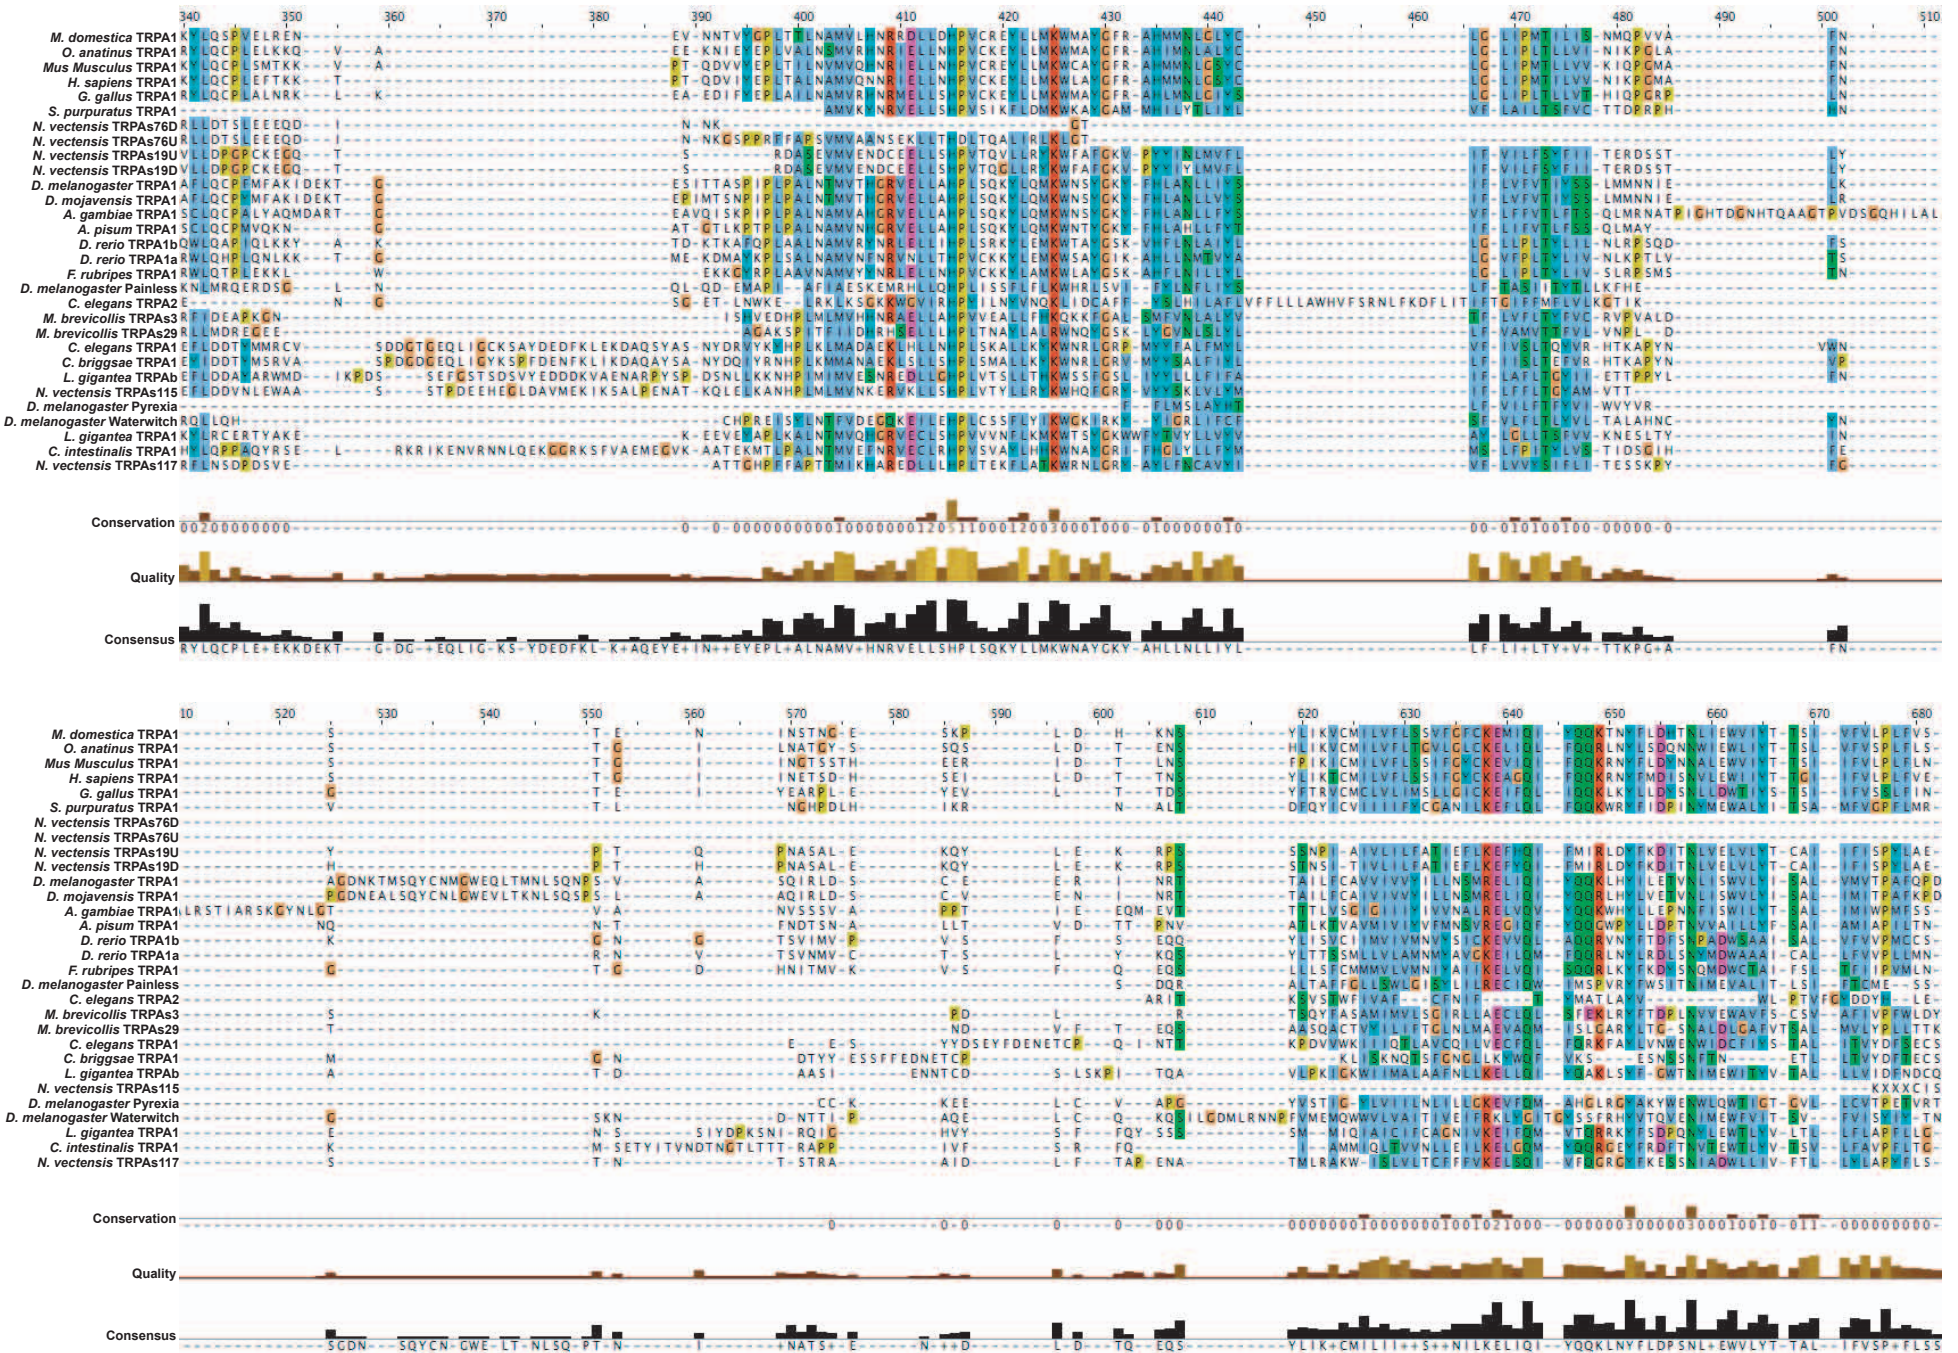

# Garrity\_supplementary fig. 9 (part 3 of 3)

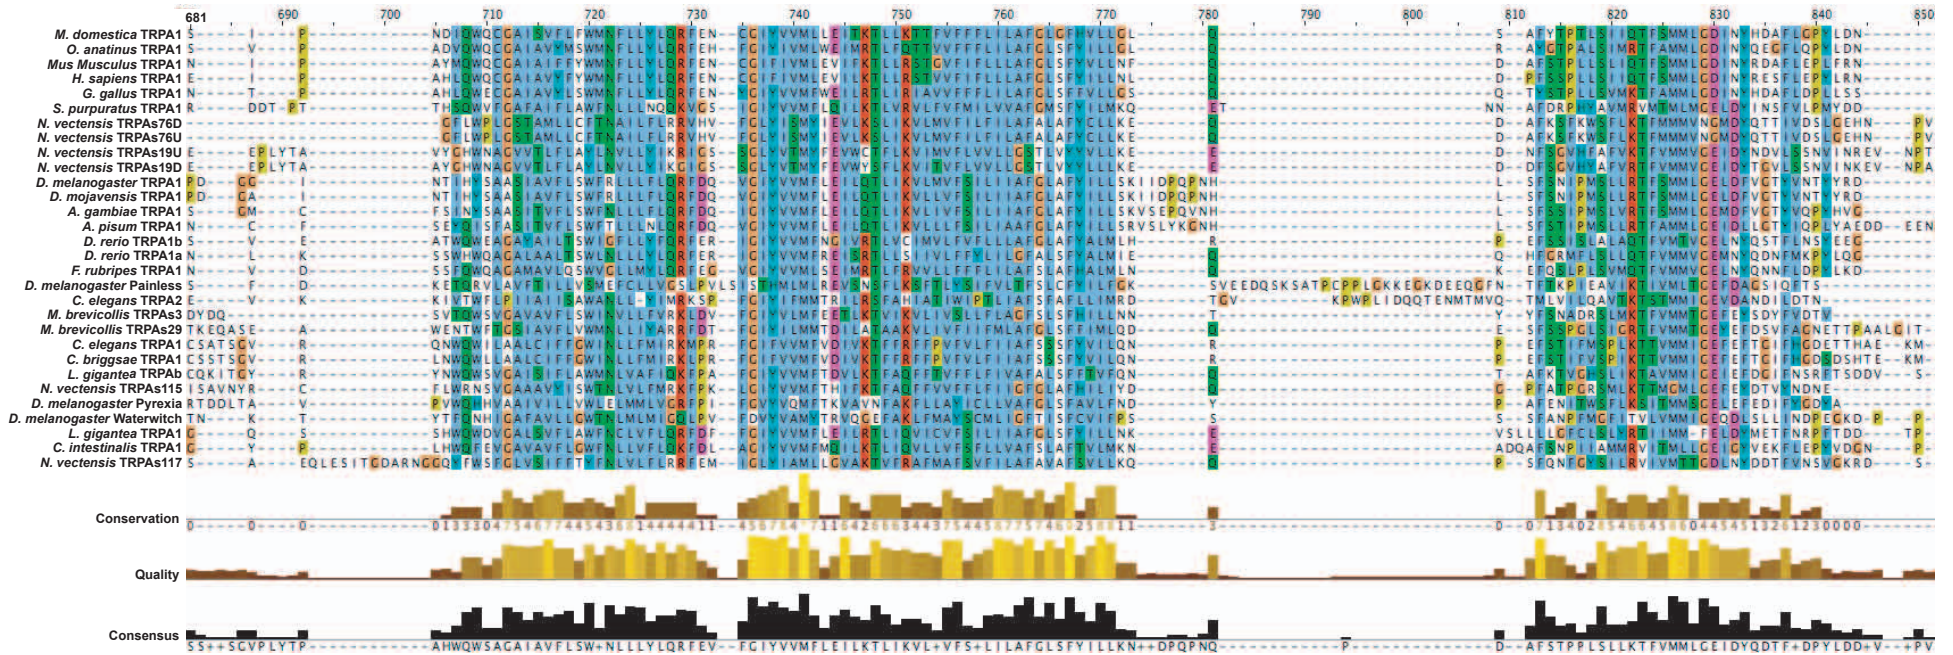

**Supplementary Figure 9: TRPA channel multiple sequence alignment.** Multiple sequence alignments were visualized using JAL2.4<sup>37</sup>. Conservation is a measure of conservation of physico-chemical properties of residues calculated as described<sup>38</sup>. Quality is a measure of the likelihood of mutations at a given residue<sup>37</sup>. Consensus reflects percentage conserving modal residue.
